# Supplementary material
Source: Springer Nature journal article supplement (https://www.springermedizin.de/resource/supplementary/13054_2012_1866_MOESM6_ESM.pdf/9711690)

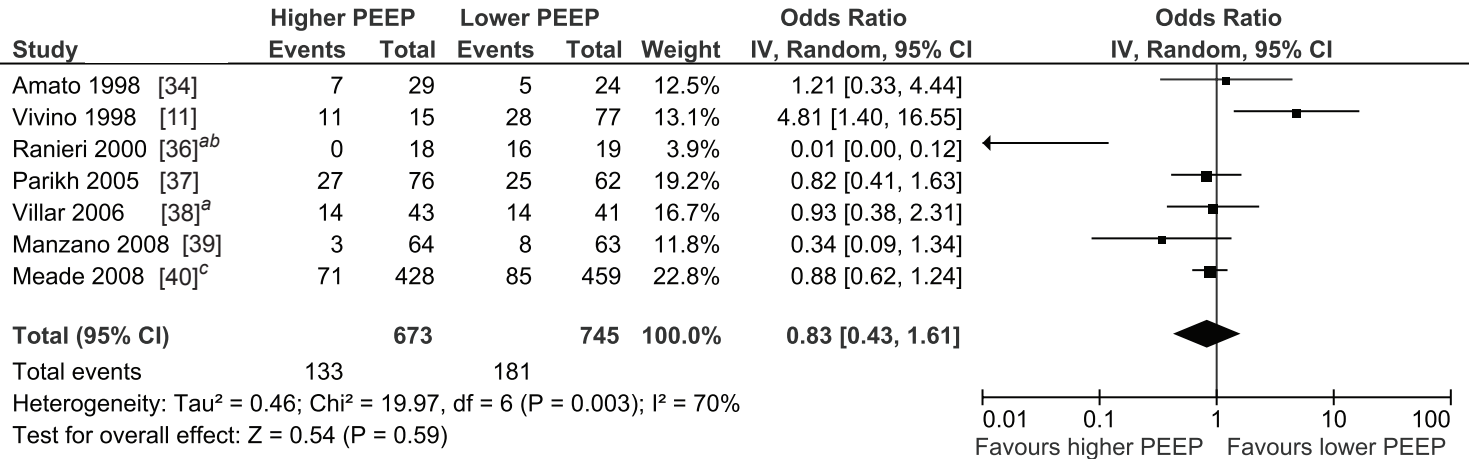

Supplement: MOESM6 [file 9711690]
